# Supplementary material for: Cd(ii) coordination polymers constructed with a flexible carboxylate linker and pyridyl co-linkers: variation in the network topologies and photoluminescence properties
Source: Royal Society of Chemistry journal article supplement (doi:10.1039/c7ce00156h), 2017-01-01
Supplement: c7ce00156h1.pdf [file c7ce00156h1.pdf]

## **Cd(II) Coordination Polymers Built with a Flexible Carboxylate Linker and Pyridyl Co-linkers: Variation in Network Topologies and Photoluminescence Properties**

*Anoop K. Gupta, Kapil Tomar and Parimal K. Bharadwaj\**

*Department of Chemistry, Indian Institute of Technology Kanpur, Kanpur 208016, India.*

*Email: pkb@iitk.ac.in*

### **EXPERIMENTAL SECTION**

**Materials.** Reagent-grade 5-hydroxyisophthalic acid, 2 (bromomethyl)benzonitrile, 4-aminopyridine, sodium hypochlorite solution, N,N-diethylformamide (DEF), 1,3-di(4-pyridyl)propane (1,3-dpp), 1,2-di(4-pyridyl)ethane (1,2-dpe), 1,2-di(4-pyridyl)ethylene (dpe), 4,4'-bipyridyl (4,4'-bpy) and Cd(NO<sub>3</sub>)<sub>2</sub>·4H<sub>2</sub>O were acquired from Aldrich and used as received. All solvents, HCl, NaOH and K<sub>2</sub>CO<sub>3</sub> were procured from S. D. Fine Chemicals, India. The solvents were purified prior to use following standard methods.

**Physical Measurement.** Infrared spectra were recorded on Perkin-Elmer Model 1320 spectrometer (KBr disk, 400–4000 cm<sup>-1</sup>). <sup>1</sup>H-NMR and <sup>13</sup>C-NMR spectra were recorded on a JEOL-ECX 500 FT (500 MHz and 125 MHz respectively) instrument in CDCl<sub>3</sub> and DMSO-*d*<sub>6</sub> with Me<sub>4</sub>Si as the internal standard. ESI-mass spectra were recorded on a WATERS Q-TOF Premier mass spectrometer. Thermogravimetric analyses (TGA) were recorded on Mettler Toledo Star System (heating rate of 5°C/min). Microanalyses for the compounds were obtained using a CE-440 elemental analyzer (Exeter Analytical Inc.). The solid-state emission spectra were recorded using a Jobin Yvon Horiba Fluorolog-3 spectrofluorimeter at room temperature (RT). The UV-vis spectra were recorded on a Shimadzu 2450 UV-vis spectrophotometer at RT.

The steady-state emission spectra of the complexes dispersed in solvents were obtained using a Agilent Cary eclipse fluorescence spectrophotometer at RT. Powder X-ray diffraction (Cu K $\alpha$  radiation, scan rate 3°/min, 293 K) was performed on a Bruker D8 Advance Series 2 powder X-ray diffractometer.

**X-ray Structural Studies.** The details of single-crystal X-ray analysis were carried out as described earlier.<sup>1</sup> The calculations to solve the structures and to refine the model proposed were carried out with the programs SHELXS<sup>2</sup> and SHELXL2014.<sup>3</sup> All non-hydrogen atoms in **1–6** were refined anisotropically. In compound **2** atoms C29 and C30 are non-positive definite. The H-atoms attached to carbon atoms were positioned geometrically and treated as riding atoms using SHELXL default parameters. For **2**, squeeze refinement was performed using PLATON<sup>4</sup> and the molecular formula was assigned using elemental data, TGA and squeeze details. Crystallographic data have been deposited with the Cambridge Crystallographic Data Center and CCDC numbers: 1527973-1527978. Lattice parameters of the **1–6**, data collection and refinement parameters are summarized in Table S1 and selected bond distances and bond angles are given in Table S2.

### **Synthesis of the ligand (H<sub>3</sub>L)**

This reported ligand H<sub>3</sub>L (scheme 1) was synthesized by following a previously reported procedure<sup>5</sup> with a slight modification in the reactant, and the pyridyl-based ligand dpd was synthesized according to the literature procedure<sup>6</sup> and was characterized by elemental analysis, <sup>1</sup>H and <sup>13</sup>C NMR spectroscopy, and ESI-MS analysis.

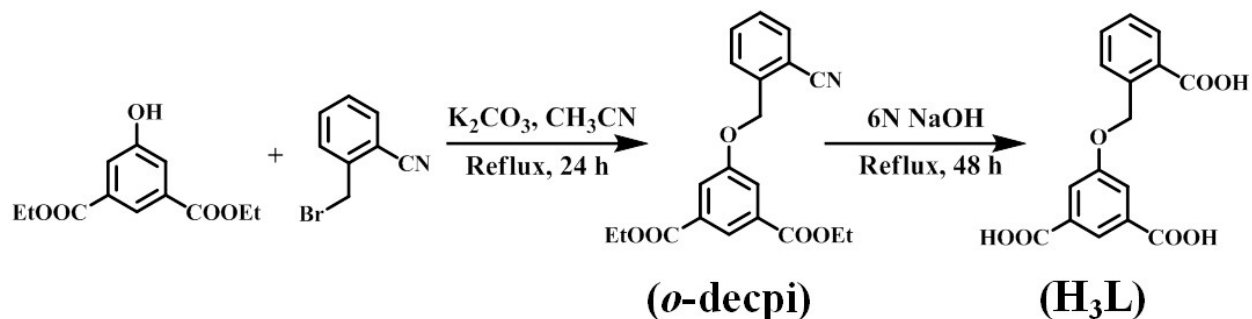

**Scheme S1.** The synthetic scheme for preparation of (**H<sub>3</sub>L**).

### Synthesis of diethyl 5-(2-cyanophenethyl)isophthalate (*o*-decpi)

5-Hydroxyisophthalic acid diethyl ester (2 g, 8.4 mmol) and dry K<sub>2</sub>CO<sub>3</sub> (1.7 g, 12.6 mmol) were mixed in a round-bottom flask under an inert atmosphere. Dry acetonitrile (10 mL) was added to it, and the mixture was stirred for 30 min at 80 °C. The mixture was treated with 2-(bromomethyl)benzonitrile (1.65 g, 8.40 mmol), and the resulting solution was refluxed for 24 h. At the end of this period, it was allowed to cool to room temperature and poured in ice-cold water (75 mL) to obtain a white solid that was collected by filtration and dried in air. Yield: 2.8g (86%). <sup>1</sup>H-NMR (CDCl<sub>3</sub>, 400 MHz): 8.3251(s, 1H), 7.8436 (s, 2H), 7.7297 - 7.6372 (m, 3H), 7.4774 - 7.4547 (m, 1H), 5.318 (s, 2H), 4.3946 (q, J = 7.12 Hz, 4H), 1.4002 (t, J = 5.84 Hz, 6H); <sup>13</sup>C NMR (DMSO-d<sub>6</sub>, 125 MHz):165, 158, 139, 133, 132, 128, 124, 120, 117, 111,77, 68, 61, 14; IR (cm<sup>-1</sup>, KBr pellet): 3087 (m), 2983 (m), 2229 (m), 1713 (s), 1598(m), 1451(m), 1334(s), 1236 (s), 1128(m), 1044;(s), 957(s), 889(m), 768(s); ESI-MS: m/z [M+H]<sup>+</sup> 354.13 (100%) , [M+H<sub>2</sub>O]<sup>+</sup> 371.16 (60%). Elemental analysis: Calcd. for C<sub>20</sub>H<sub>19</sub>NO<sub>5</sub> (353.37): C, 67.97; H, 5.42; N, 3.96 % Found: C, 67.39; H, 5.51; N, 3.75 %.

### Synthesis of 5-(2-Carboxybenzyloxy)isophthalic acid (**H<sub>3</sub>L**).

Compound *o*-dmcbi obtained as above (2 g, 5.17 mmol) was hydrolyzed by refluxing it with 6(N) NaOH solution (20 mL) for 24 h. After cooling to 5 °C, the resulting solution was

acidified with 6(N) HCl solution to obtain a white precipitate. It was collected by filtration, washed thoroughly with water, and dried in air. Yield: 1.3 g (80%). It has been characterized by  $^1\text{H}$  NMR (DMSO- $d_6$ , 400 MHz), Mass Spectrometry, IR spectroscopy, elemental analysis.  $^1\text{H}$ -NMR (DMSO- $d_6$ , 400 MHz): 8.0537 (s, 1H), 7.9117 - 7.8920 (m, 1H), 7.6685 - 7.6380 (m, 3H), 7.5694 (t, J = 7.76 Hz, 1H), 7.4205 (t, J = 7.28 Hz, 1H), 5.5069 (s, 2H);  $^{13}\text{C}$  NMR (DMSO- $d_6$ , 125 MHz): 169, 167, 159, 138, 131, 128, 123, 119, 100, 69, 40; IR ( $\text{cm}^{-1}$ , KBr pellet): 3403(broad), 3201(broad), 2625 (m), 1711(m), 1594(m), 1472(m), 1395(m), 1271(m), 1152(m), 1044(m), 953(m), 871(m), 759(s); ESI-MS:  $m/z$   $[\text{M}]^+$  316.06 (20%) ,  $[\text{M}-\text{H}]^+$  315.05(100%). Elemental analysis: Calcd. for  $\text{C}_{16}\text{H}_{12}\text{O}_7$  (316.26): C, 60.76; H, 3.82% Found: C, 59.97; H, 3.75%.

#### **Elemental analysis and IR of compound 1-6**

Compound **1** Anal. Calcd for  $\text{C}_{32}\text{H}_{42}\text{Cd}_3\text{O}_{26}$ : C, 32.57; H, 3.58%. Found: C, 32.42; H, 3.63%. IR ( $\text{cm}^{-1}$ ): 3445(broad), 2926(m), 1610(s), 1580(s), 1555(m), 1449(m), 1384(sh), 1265(s), 1104(sh), 1058(m), 994(m), 775(sh), 736(sh), 475(m).

Compound **2** Anal. Calcd for  $\text{C}_{62.5}\text{H}_{55.5}\text{Cd}_3\text{N}_{6.5}\text{O}_{18.5}$ : C, 49.82; H, 3.60; N, 5.86%. Found: C, 49.67; H, 3.73; N, 5.79%. IR ( $\text{cm}^{-1}$ ): 3407(broad), 2906(m), 2486(m), 1617(s), 1559(s), 1448(m), 1378(s), 1261(m), 1129(m), 1079(m), 1041(m), 964(m), 836(m), 782(s), 733(s), 548(s).

Compound **3** Anal. Calcd for  $\text{C}_{44}\text{H}_{36}\text{Cd}_2\text{N}_2\text{O}_{17}$ : C, 48.50; H, 3.33; N, 2.57%. Found: C, 48.66; H, 3.26; N, 2.48%. IR ( $\text{cm}^{-1}$ ): 3407(broad), 3084(m), 1729(s), 1608(s), 1559(s), 1504(m), 1448(m), 1378(s), 1261(m), 1129(m), 1079(m), 1041(m), 964(m), 836(m), 782(s), 733(s).

Compound **4** Anal. Calcd for  $C_{21}H_{16}CdN_2O_8$ : C, 46.98; H, 3.01; N, 5.22%. Found: C, 46.61; H, 3.14; N, 5.11%. IR ( $cm^{-1}$ ): 3407(broad), 3083(m), 1727(s), 1605(m), 1559(s), 1492(m), 1449(m), 1377(s), 1260(s), 1129(m), 1039(s), 933(m), 856(s), 781(s), 733(s).

Compound **5** Anal. Calcd for  $C_{22}H_{16}CdNO_7$ : C, 50.93; H, 3.11; N, 2.70%. Found: C, 51.07; H, 3.26; N, 2.81%. IR ( $cm^{-1}$ ): 3071(m), 2929(m), 1703(m), 1671(m), 1604(m), 1548(s), 1450(m), 1369(s), 1241(m), 1145(m), 1053(s), 930(m), 885(m), 830(m), 798(s), 726(s).

Compound **6** Anal. Calcd for  $C_{58}H_{52}Cd_3N_4O_{17}$ : C, 49.25; H, 3.70; N, 3.96%. Found: C, 48.87; H, 3.38; N, 4.17%. IR ( $cm^{-1}$ ): 3496(broad), 3072(m), 2927(m), 1961(s), 1816(s), 1567(s), 1504(m), 1447(m), 1405(s), 1367(s), 1323(m), 1230(m), 1152(m), 1040(s), 994(m), 801(s), 775(s), 724(s).

## Result and Discussion

The compounds **1–6** were easily synthesized adopting the solvothermal technique at 130 °C for 48 h. Once isolated, all the compounds were found to be stable in air and insoluble in common organic solvents and water. All the compounds were formulated by single-crystal X-ray diffraction and further corroborated by TGA and elemental analysis. The phase purity of **1–6** were confirmed by comparing the experimental and simulated powder X-ray diffraction patterns. The IR spectra (Fig. S9–S14) of the compounds except **5** show a broad peak in the range of 3230–3560  $cm^{-1}$ , indicating the presence of lattice and coordinated water molecules<sup>7</sup> while in **5** no such band is observed. Besides, strong absorption bands observed between 1400–1600  $cm^{-1}$  in **1–6** are diagnostic of coordinated carboxylate groups.<sup>8</sup> In **2**, sharp peaks between 1610 and 1650  $cm^{-1}$  are indicative of the presence of DEF molecules.<sup>9</sup> In **3**, **4**, and **5**, a band in the region 1690–1730  $cm^{-1}$  suggests the presence of a protonated carboxylate group.<sup>10</sup> The peak in the range of 1604–1629  $cm^{-1}$  corresponds to the presence of  $-N=N-$  in **4**.<sup>11</sup>

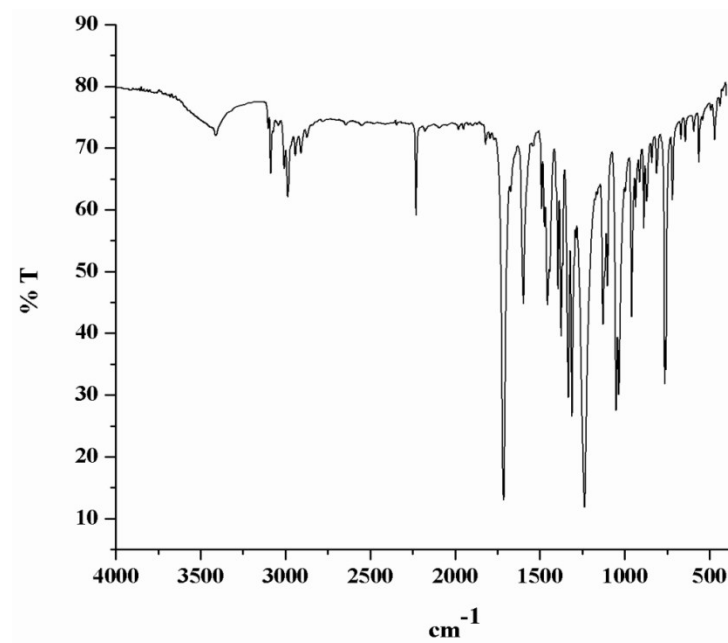

**Fig. S1** IR Spectrum of *o*-decpi.

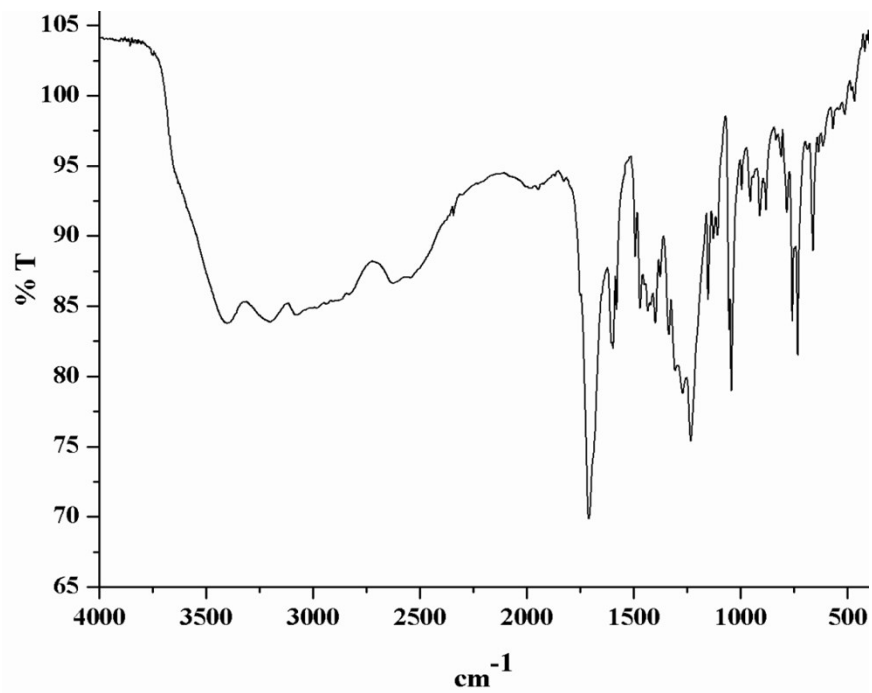

**Fig. S2** IR Spectrum of H<sub>3</sub>L.

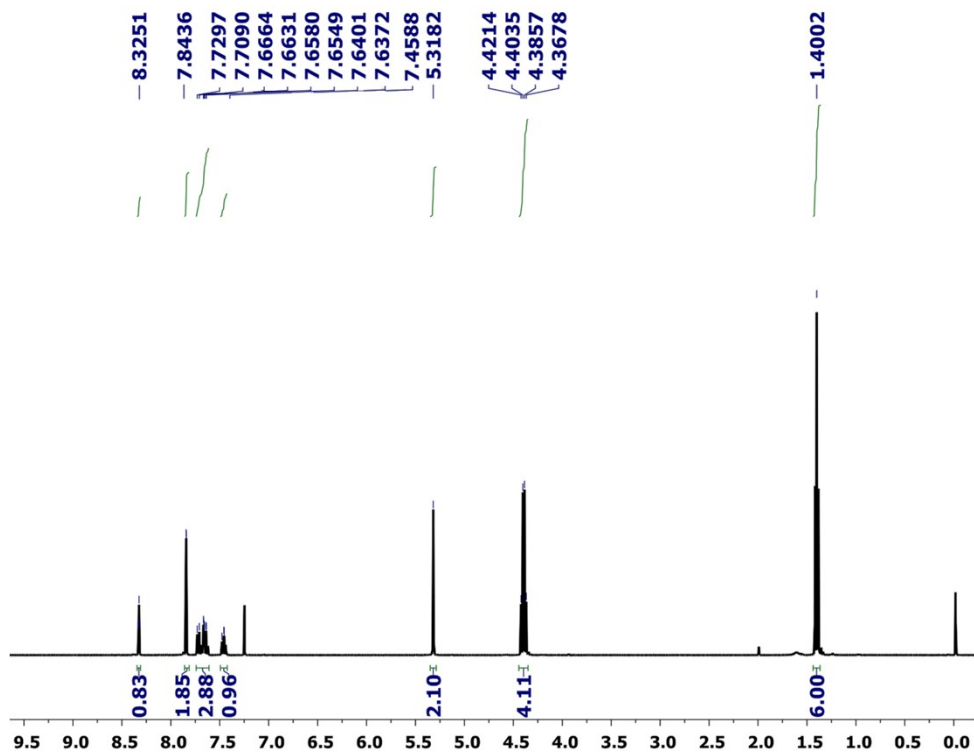

Fig. S3  $^1\text{H}$  NMR spectrum of *o*-decpi.

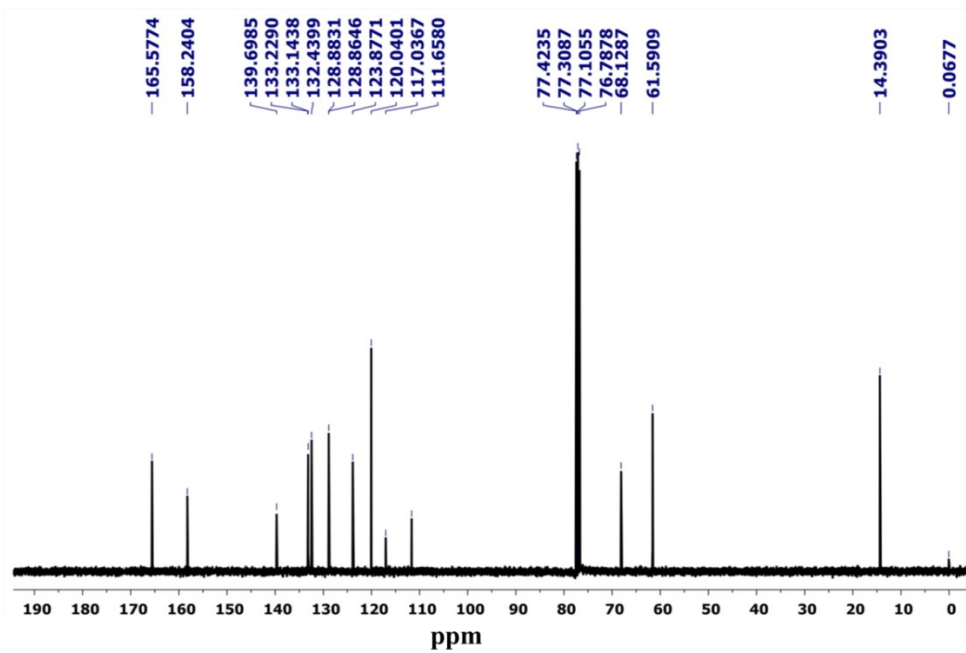

Fig. S4  $^{13}\text{C}$  NMR spectrum of *o*-decpi.

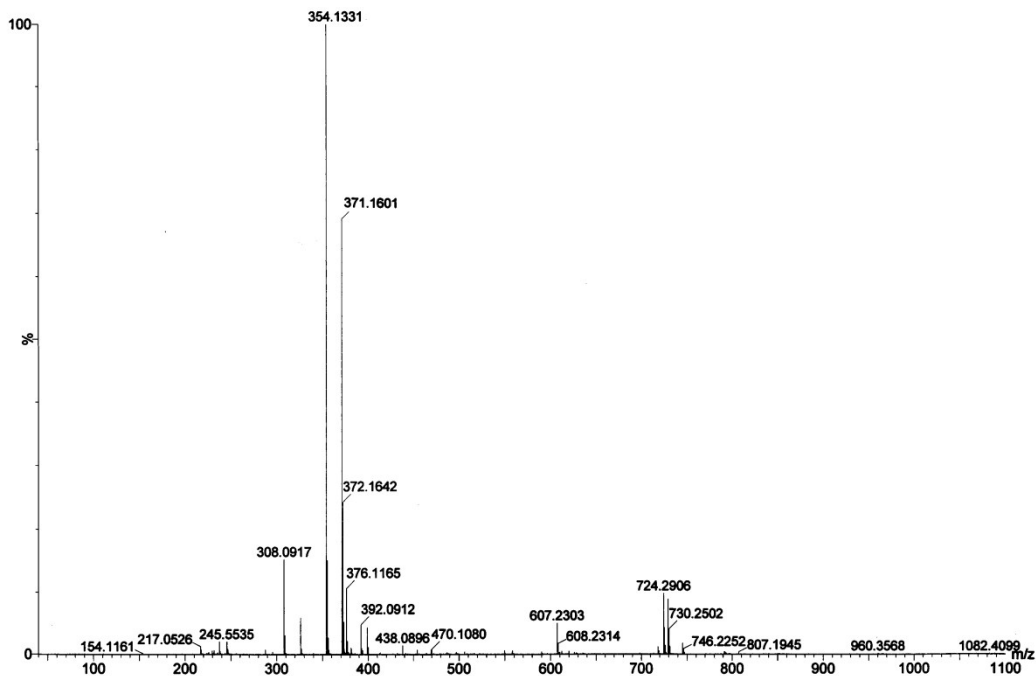

Fig. S5 ESI-MS spectrum of *o*-decpi.

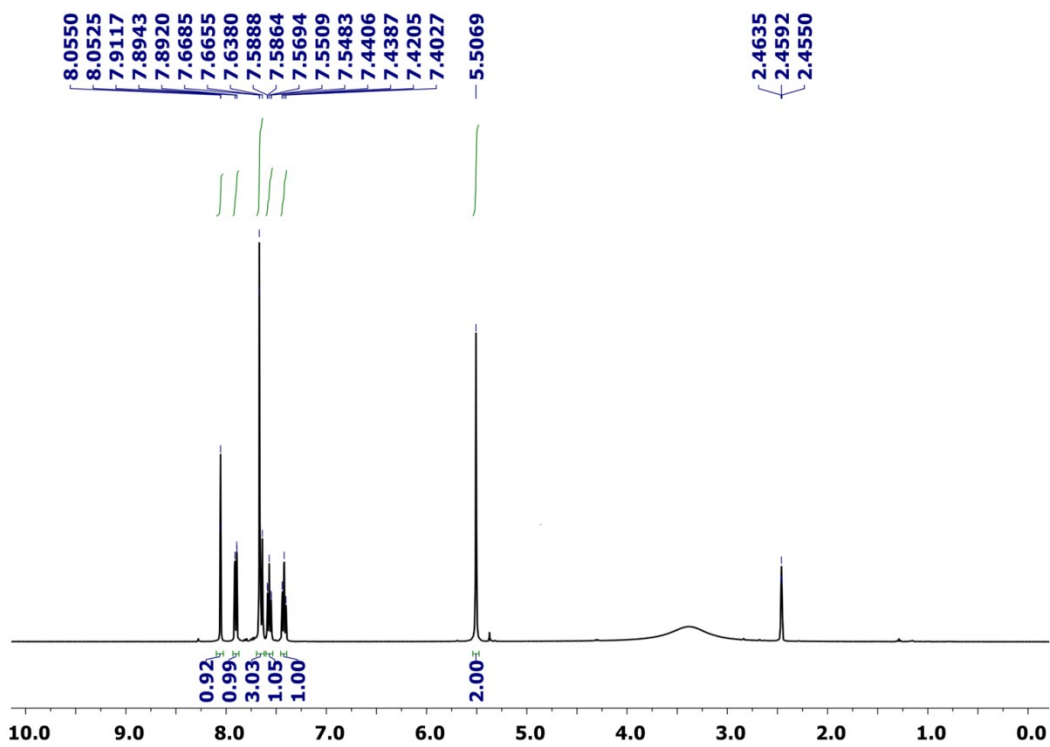

Fig. S6  $^1\text{H}$  NMR spectrum of  $\text{H}_3\text{L}$ .



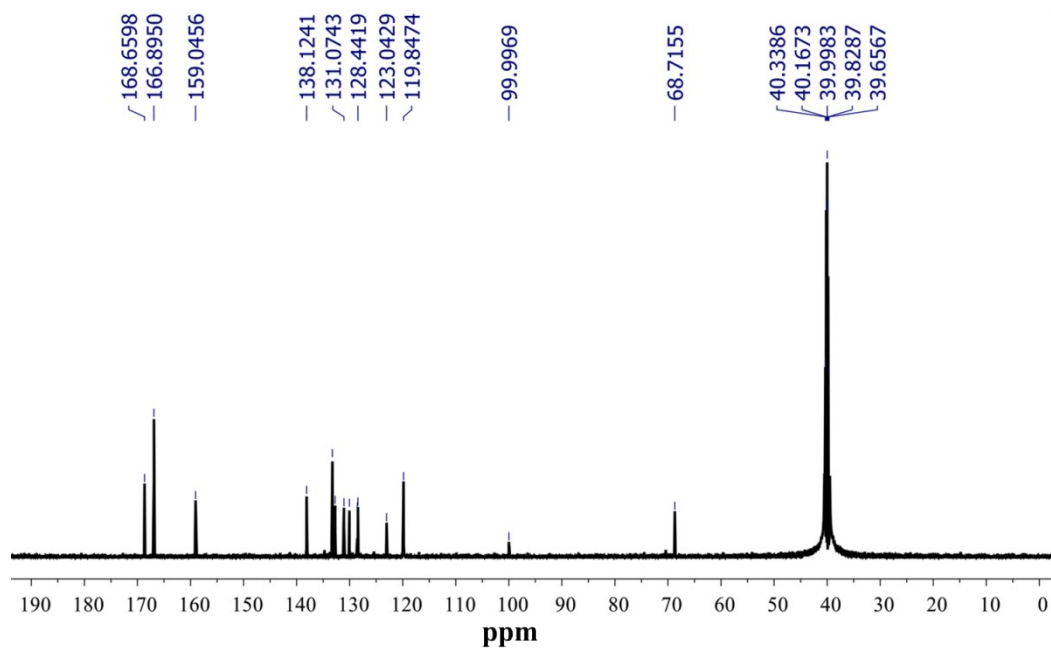

Fig. S7  $^{13}\text{C}$  NMR spectrum of  $\text{H}_3\text{L}$ .

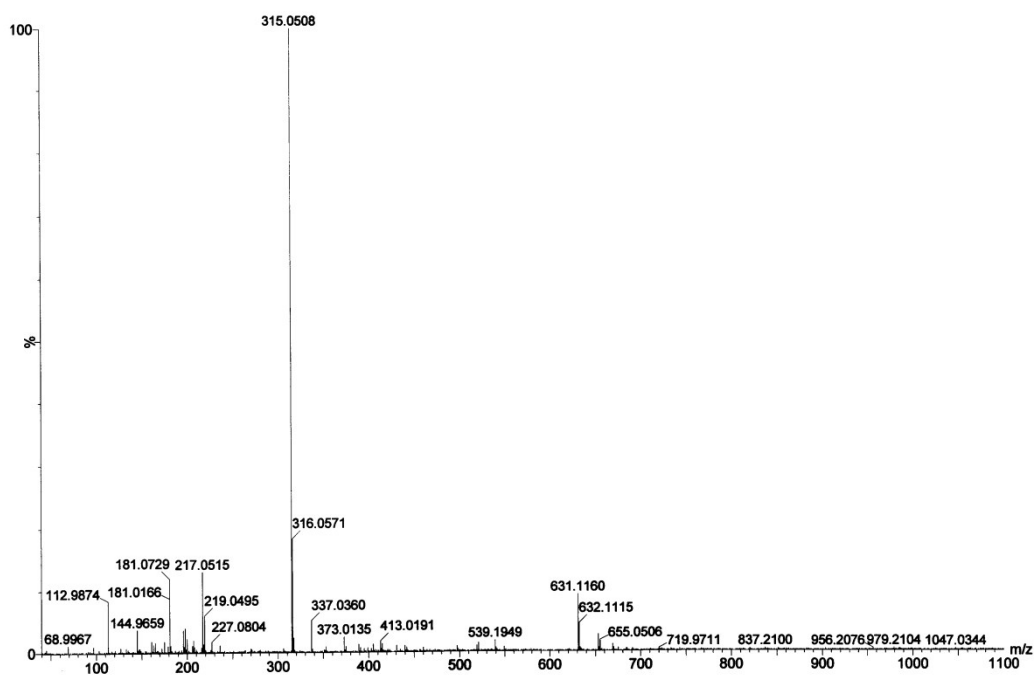

Fig. S8 ESI-MS spectrum of  $\text{H}_3\text{L}$ .

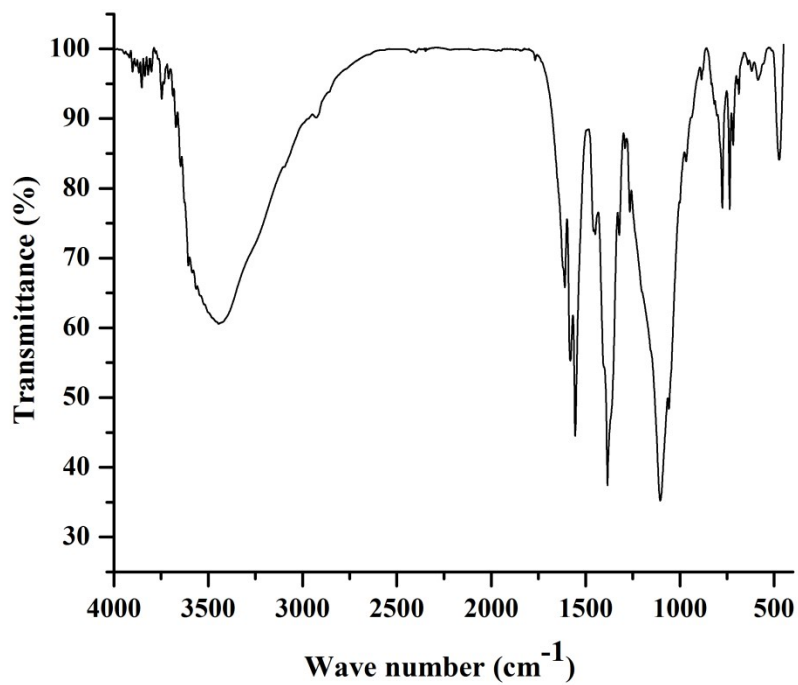

**Fig. S9** IR spectrum of 1.

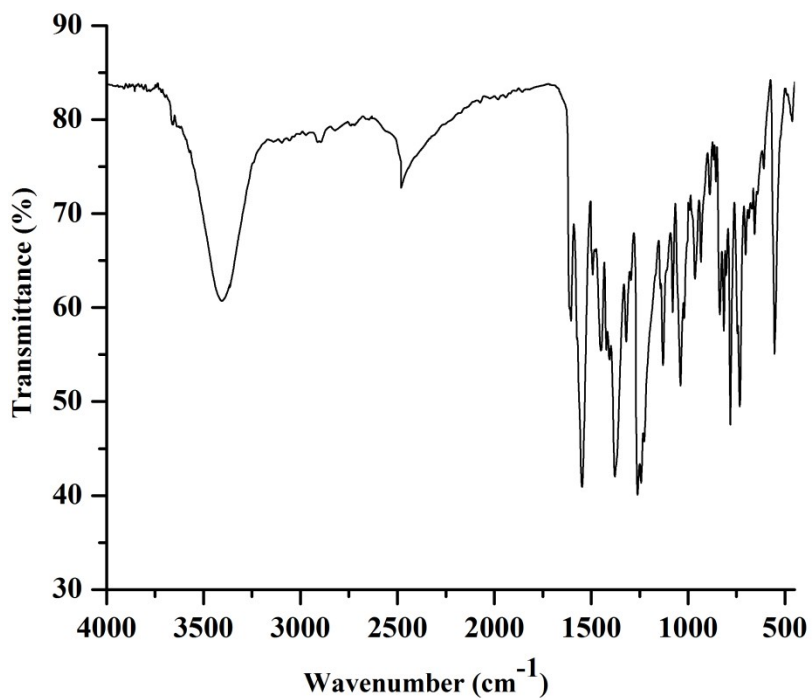

**Fig. S10** IR spectrum of 2.

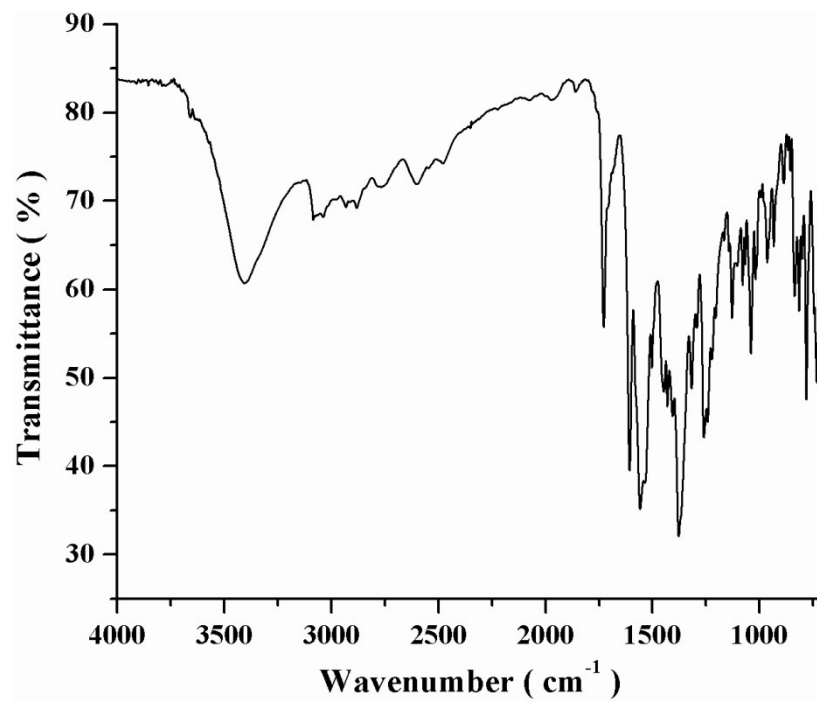

**Fig. S11** IR spectrum of 3.

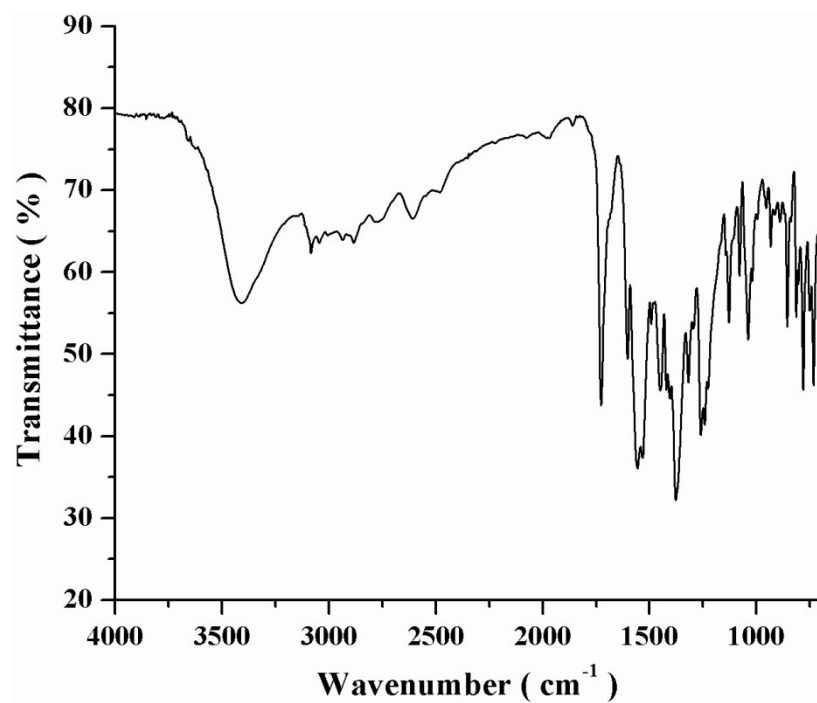

**Fig. S12** IR spectrum of 4.

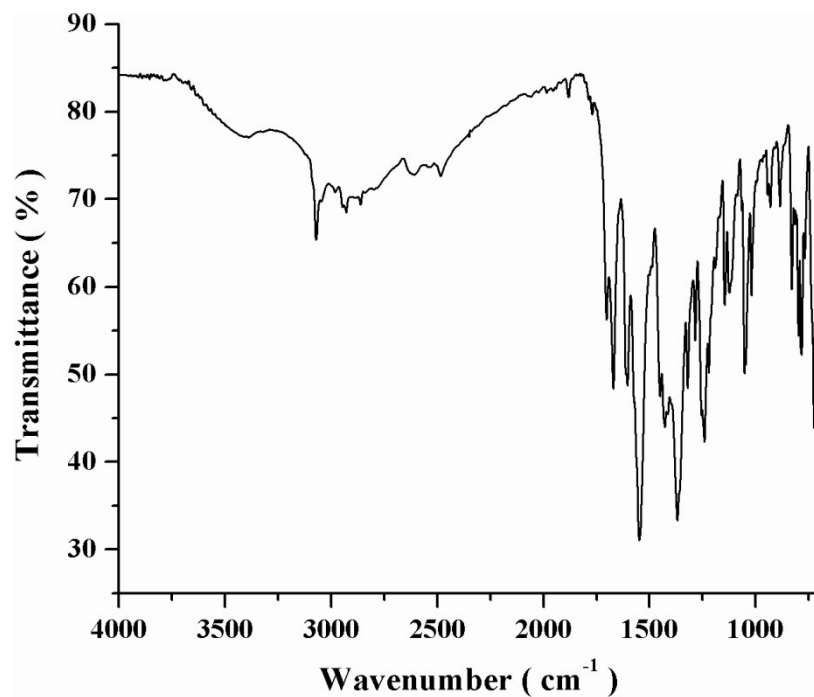

**Fig. S13** IR spectrum of 5.

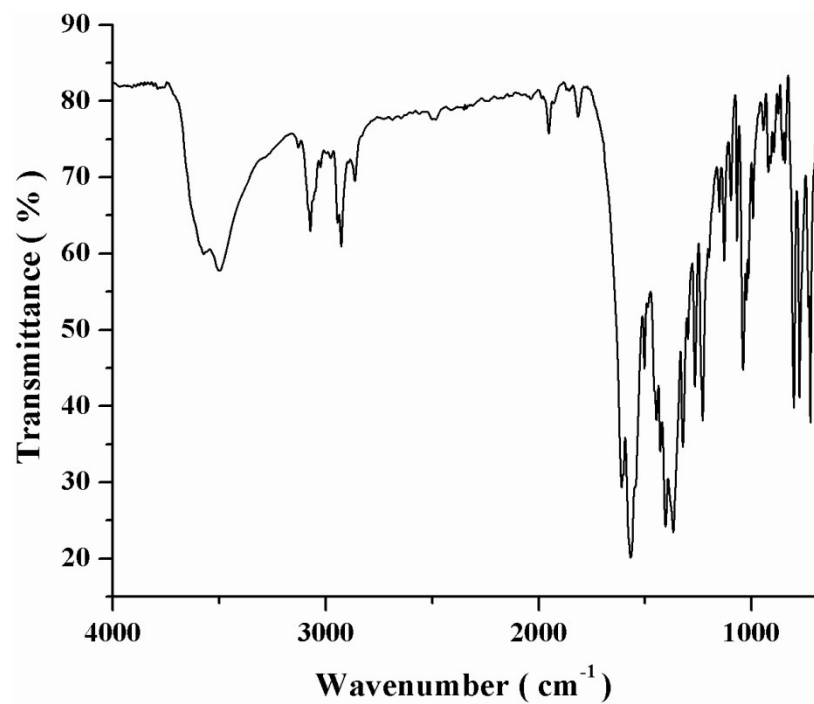

**Fig. S14** IR spectrum of 6.

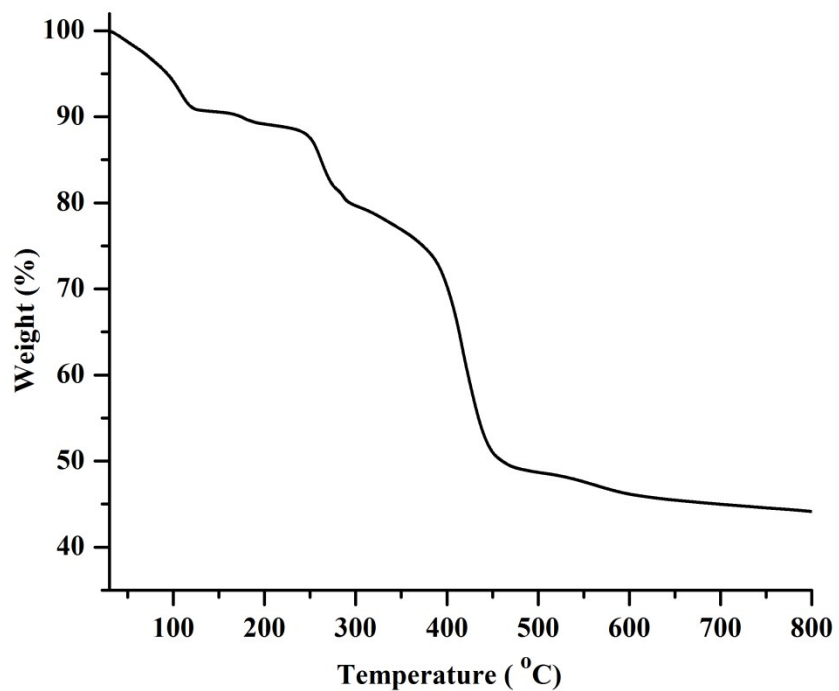

**Fig. S15** TGA of 1.

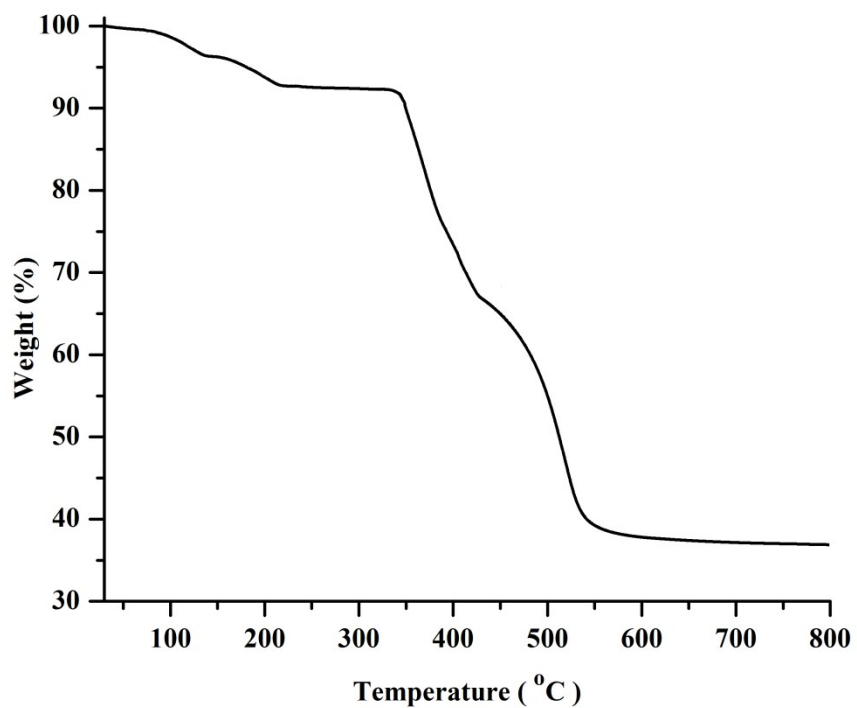

**Fig. S16** TGA of 2.

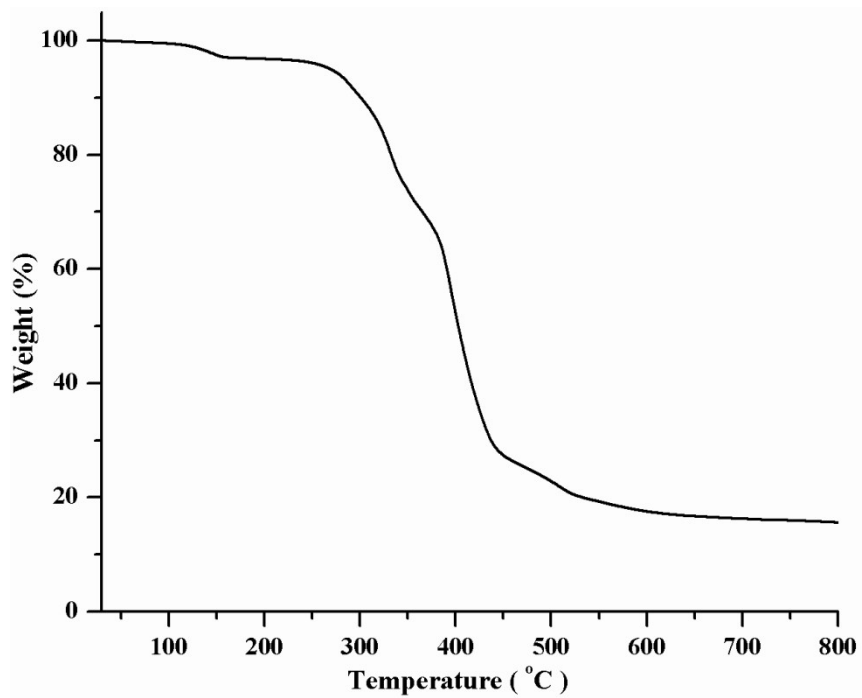

**Fig. S17 TGA of 3.**

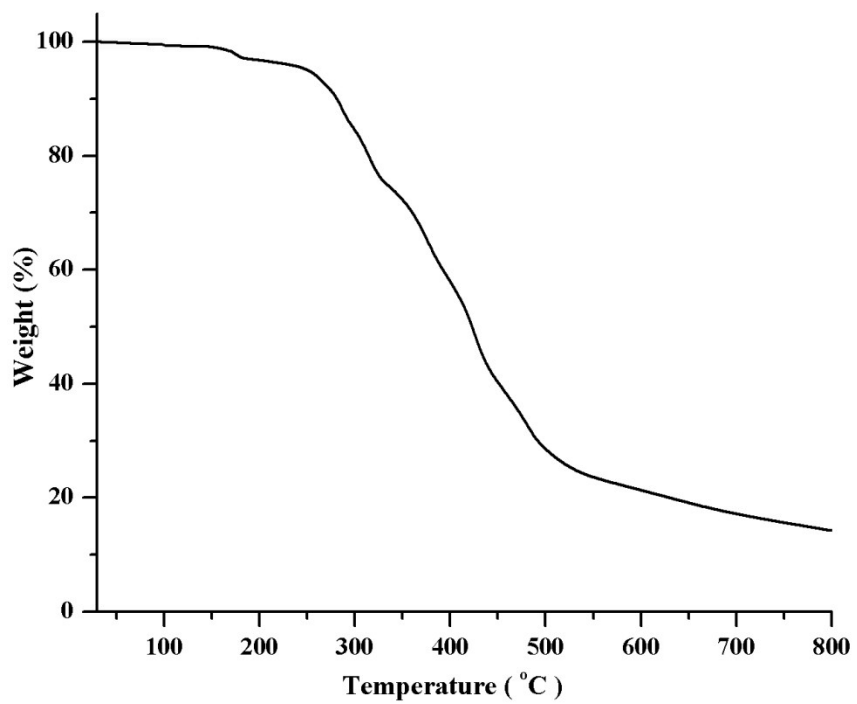

**Fig. S18 TGA of 4.**

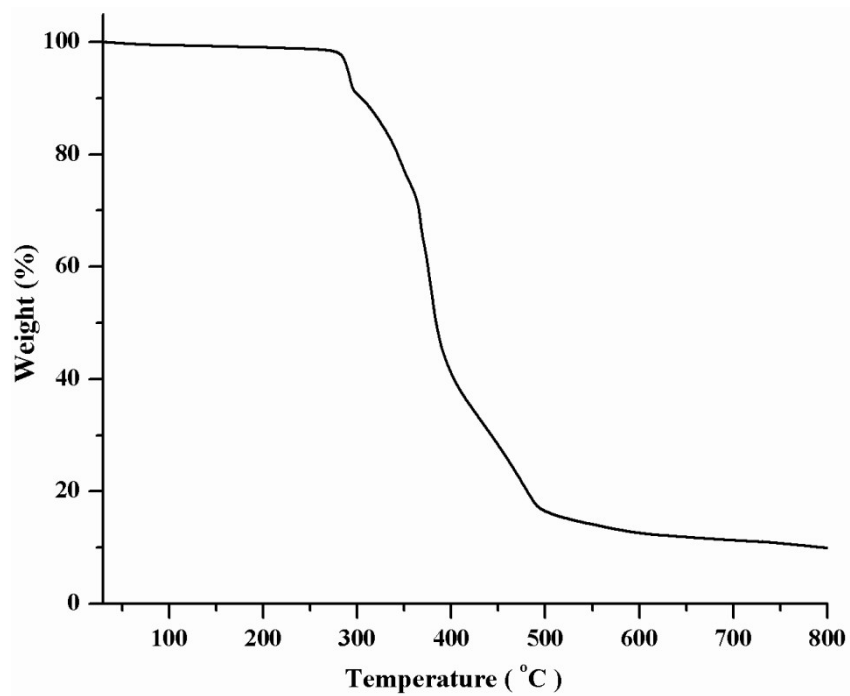

**Fig. S19** TGA of 5.

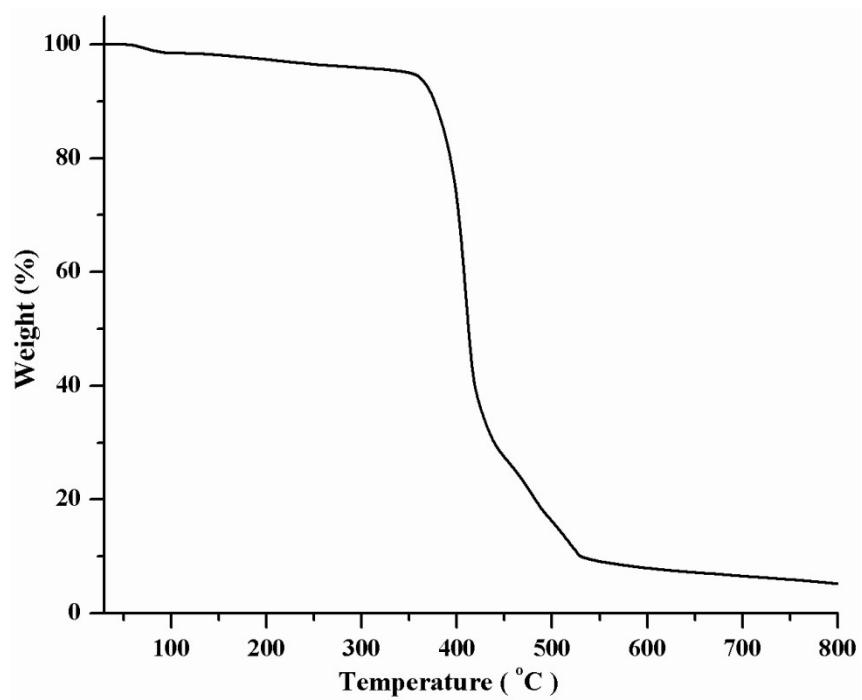

**Fig. S20** TGA of 6.

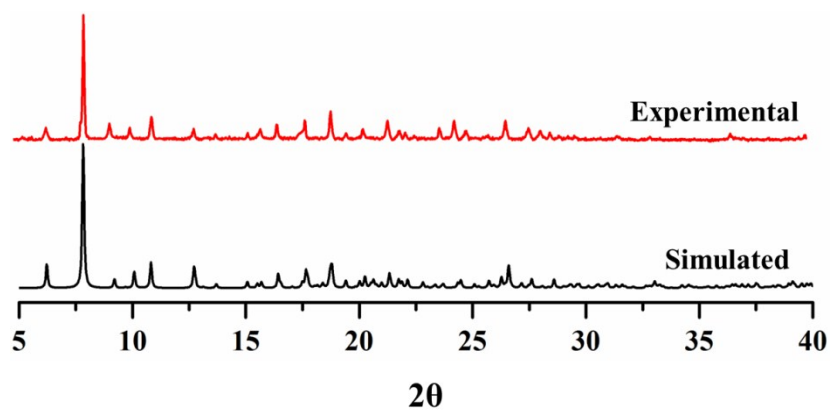

Fig. S21 PXR D of 1.

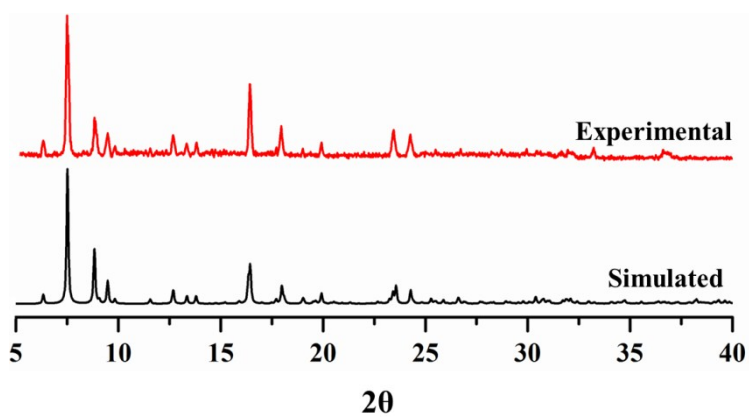

Fig. S22 PXR D of 2.

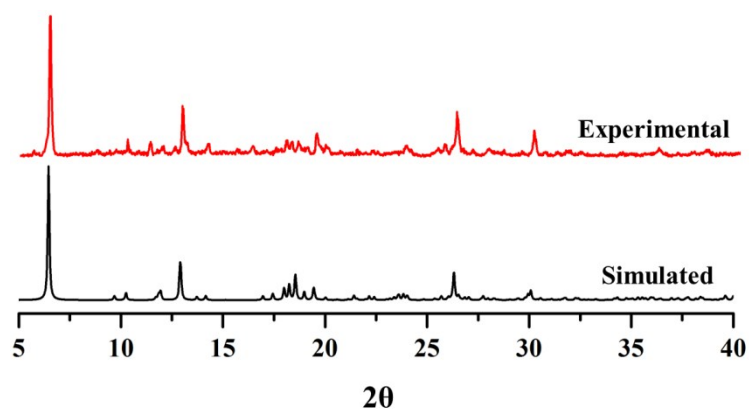

Fig. S23 PXR D of 3.



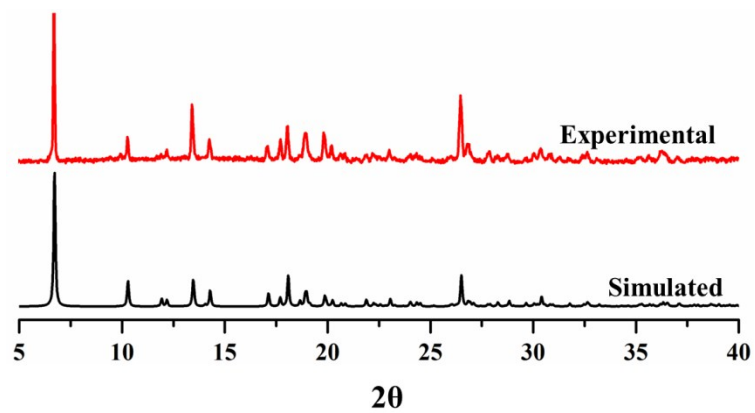

Fig. S24 PXR D of 4.

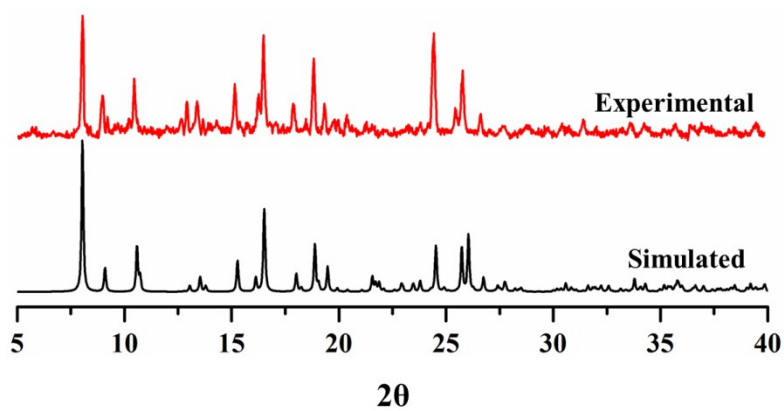

Fig. S25 PXR D of 5.

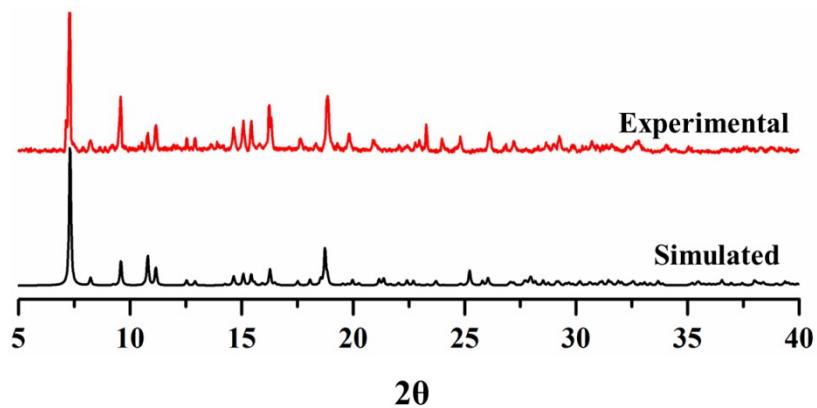

Fig. S26 PXR D of 6.

**Table S1. Crystal and Structure Refinement Data for 1–6.**

| <b>Parameters</b>                      | <b>Compound 1</b>                                               | <b>Compound 2</b>                                                              | <b>Compound 3</b>                                                              |
|----------------------------------------|-----------------------------------------------------------------|--------------------------------------------------------------------------------|--------------------------------------------------------------------------------|
| Empirical formula                      | C <sub>32</sub> H <sub>40</sub> Cd <sub>3</sub> O <sub>26</sub> | C <sub>62</sub> H <sub>46</sub> Cd <sub>3</sub> N <sub>6</sub> O <sub>16</sub> | C <sub>44</sub> H <sub>34</sub> Cd <sub>2</sub> N <sub>2</sub> O <sub>17</sub> |
| Formula wt.                            | 1177.87                                                         | 1468.28                                                                        | 1087.55                                                                        |
| Crystal system                         | Orthorhombic                                                    | Monoclinic                                                                     | Triclinic                                                                      |
| Space group                            | <i>P</i> 2 <sub>1</sub> 2 <sub>1</sub> 2 <sub>1</sub>           | <i>P</i> 2/ <i>c</i>                                                           | <i>P</i> -1                                                                    |
| <i>a</i> , Å                           | 9.995(5)                                                        | 16.164(5)                                                                      | 8.363(9)                                                                       |
| <i>b</i> , Å                           | 18.248(5)                                                       | 11.755(5)                                                                      | 10.188(11)                                                                     |
| <i>c</i> , Å                           | 22.570(5)                                                       | 20.199(4)                                                                      | 14.322(15)                                                                     |
| $\alpha$ (deg)                         | 90                                                              | 90                                                                             | 98.845(15)                                                                     |
| $\beta$ (deg)                          | 90                                                              | 120.402(17)                                                                    | 100.165(14)                                                                    |
| $\gamma$ (deg)                         | 90                                                              | 90                                                                             | 112.564(12)                                                                    |
| <i>U</i> , Å <sup>3</sup>              | 4117(3)                                                         | 3310.2(19)                                                                     | 1076(2)                                                                        |
| <i>Z</i>                               | 4                                                               | 2                                                                              | 1                                                                              |
| $\rho_{\text{calc}}$ g/cm <sup>3</sup> | 1.900                                                           | 1.473                                                                          | 1.678                                                                          |
| $\mu$ , mm <sup>-1</sup>               | 1.630                                                           | 1.022                                                                          | 1.064                                                                          |
| Temperature (°K)                       | 100                                                             | 100                                                                            | 100                                                                            |

|                                         |                             |                             |                             |
|-----------------------------------------|-----------------------------|-----------------------------|-----------------------------|
| $\theta_{\max}$                         | 25.50                       | 25.50                       | 25.11                       |
| $F(000)$                                | 2336                        | 1464                        | 544                         |
| Refl. collected                         | 32964                       | 24013                       | 5434                        |
| Independent refl.                       | 7661                        | 6170                        | 3831                        |
| GOOF                                    | 1.080                       | 1.007                       | 1.148                       |
| Final R indices<br>[ $I > 2\sigma(I)$ ] | R1 = 0.0388<br>wR2 = 0.0900 | R1 = 0.0593<br>wR2 = 0.1532 | R1 = 0.0467<br>wR2 = 0.1106 |
| R indices<br>(all data)                 | R1 = 0.0511<br>wR2 = 0.0972 | R1 = 0.0961<br>wR2 = 0.1683 | R1 = 0.0640<br>wR2 = 0.1441 |
| <b>Parameters</b>                       | <b>Compound 4</b>           | <b>Compound 5</b>           | <b>Compound 6</b>           |
| Empirical formula                       | $C_{21}H_{16}CdN_2O_8$      | $C_{22}H_{16}CdNO_7$        | $C_{58}H_{52}Cd_3N_4O_{17}$ |
| Formula wt.                             | 536.77                      | 518.77                      | 1414.27                     |
| Crystal system                          | Triclinic                   | Triclinic                   | Triclinic                   |
| Space group                             | $P-1$                       | $P-1$                       | $P-1$                       |
| $a$ , Å                                 | 8.322(5)                    | 8.418(5)                    | 9.904(5)                    |
| $b$ , Å                                 | 10.111(5)                   | 10.214(5)                   | 11.945(5)                   |

|                                         |                             |                             |                             |
|-----------------------------------------|-----------------------------|-----------------------------|-----------------------------|
| $c$ , Å                                 | 14.048(5)                   | 11.382(5)                   | 13.078(5)                   |
| $\alpha$ (deg)                          | 99.667(5)                   | 75.111(5)                   | 69.194(5)                   |
| $\beta$ (deg)                           | 102.545(5)                  | 83.956(5)                   | 75.412(5)                   |
| $\gamma$ (deg)                          | 113.317(5)                  | 78.582(5)                   | 70.291(5)                   |
| $U$ , Å <sup>3</sup>                    | 1016.2(9)                   | 925.5(8)                    | 1346.1(10)                  |
| $Z$                                     | 2                           | 2                           | 1                           |
| $\rho_{\text{calc}}$ g/cm <sup>3</sup>  | 1.754                       | 1.862                       | 1.745                       |
| $\mu$ , mm <sup>-1</sup>                | 1.128                       | 1.230                       | 1.253                       |
| Temperature (°K)                        | 100                         | 100                         | 100                         |
| $\theta_{\text{max}}$                   | 25.49                       | 26                          | 25                          |
| $F(000)$                                | 536                         | 518                         | 708                         |
| Refl. collected                         | 9809                        | 12020                       | 16441                       |
| Independent refl.                       | 3778                        | 3641                        | 4723                        |
| GOOF                                    | 1.071                       | 1.053                       | 1.028                       |
| Final R indices<br>[ $I > 2\sigma(I)$ ] | R1 = 0.0642<br>wR2 = 0.1858 | R1 = 0.0360<br>wR2 = 0.0843 | R1 = 0.0466<br>wR2 = 0.0899 |

|                         |                             |                             |                             |
|-------------------------|-----------------------------|-----------------------------|-----------------------------|
| R indices<br>(all data) | R1 = 0.0838<br>wR2 = 0.2000 | R1 = 0.0448<br>wR2 = 0.0888 | R1 = 0.0871<br>wR2 = 0.1021 |
|-------------------------|-----------------------------|-----------------------------|-----------------------------|

**Table S2 Bond distances and angles**

| $\{[\text{Cd}_3(\text{L})_2(\text{H}_2\text{O})_5(\mu\text{-H}_2\text{O})] \cdot 6\text{H}_2\text{O}\}_n$ ( <b>1</b> ) |            |                          |            |                                        |           |
|------------------------------------------------------------------------------------------------------------------------|------------|--------------------------|------------|----------------------------------------|-----------|
| <b>Bond Distances (Å)</b>                                                                                              |            |                          |            |                                        |           |
| Cd1—O23                                                                                                                | 2.264(5)   | Cd1—O24                  | 2.268(4)   | Cd1—O9                                 | 2.314(5)  |
| Cd1—O27                                                                                                                | 2.361(4)   | Cd1—O10 <sup>i</sup>     | 2.363(4)   | Cd1—O11 <sup>i</sup>                   | 2.388(4)  |
| Cd1—O8                                                                                                                 | 2.510(4)   | Cd2—O20                  | 2.273(5)   | Cd2—O22                                | 2.278(5)  |
| Cd2—O21                                                                                                                | 2.291(4)   | Cd2—O18                  | 2.340(5)   | Cd2—O16 <sup>ii</sup>                  | 2.359(4)  |
| Cd2—O17 <sup>ii</sup>                                                                                                  | 2.496(5)   | Cd2—O19                  | 2.566(4)   | Cd3—O8 <sup>iii</sup>                  | 2.252(4)  |
| Cd3—O12                                                                                                                | 2.252(4)   | Cd3—O15                  | 2.289(5)   | Cd3—O19 <sup>iv</sup>                  | 2.304(4)  |
| Cd3—O14                                                                                                                | 2.397(4)   | Cd3—O13                  | 2.547(5)   | Cd3—O27 <sup>iii</sup>                 | 2.612(5)  |
| <b>Bond Angles (°)</b>                                                                                                 |            |                          |            |                                        |           |
| O23—Cd1—O24                                                                                                            | 175.34(17) | O24—Cd1—O10 <sup>i</sup> | 88.40(16)  | O10 <sup>i</sup> —Cd1—O11 <sup>i</sup> | 54.89(15) |
| O23—Cd1—O9                                                                                                             | 93.34(19)  | O9—Cd1—O10 <sup>i</sup>  | 88.05(16)  | O23—Cd1—O8                             | 85.25(17) |
| O24—Cd1—O9                                                                                                             | 90.72(17)  | O27—Cd1—O10 <sup>i</sup> | 144.84(16) | O24—Cd1—O8                             | 99.01(15) |
| O23—Cd1—O27                                                                                                            | 95.51(18)  | O23—Cd1—O11 <sup>i</sup> | 91.03(17)  | O9—Cd1—O8                              | 54.19(15) |
| O24—Cd1—O27                                                                                                            | 83.93(16)  | O24—Cd1—O11 <sup>i</sup> | 84.34(16)  | O27—Cd1—O8                             | 73.85(15) |

|                                          |            |                             |            |                                           |            |
|------------------------------------------|------------|-----------------------------|------------|-------------------------------------------|------------|
| O9-Cd1-O27                               | 126.19(16) | O9-Cd1-O11 <sup>i</sup>     | 142.65(15) | O10 <sup>i</sup> -Cd1-O8                  | 141.32(15) |
| O23-Cd1-O10 <sup>i</sup>                 | 89.44(18)  | O27-Cd1-O11 <sup>i</sup>    | 90.15(16)  | O11 <sup>i</sup> -Cd1-O8                  | 163.10(15) |
| O20-Cd2-O22                              | 176.93(17) | O22-Cd2-O16 <sup>ii</sup>   | 88.82(16)  | O16 <sup>ii</sup> -Cd2-O17 <sup>ii</sup>  | 53.71(16)  |
| O20-Cd2-O21                              | 92.76(17)  | O21-Cd2-O16 <sup>ii</sup>   | 137.22(17) | O20-Cd2-O19                               | 90.74(16)  |
| O22-Cd2-O21                              | 88.96(16)  | O18-Cd2-O16 <sup>ii</sup>   | 89.44(16)  | O22-Cd2-O19                               | 87.02(15)  |
| O20-Cd2-O18                              | 85.24(18)  | O20-Cd2-O17 <sup>ii</sup>   | 96.04(17)  | O21-Cd2-O19                               | 80.72(15)  |
| O22-Cd2-O18                              | 91.73(17)  | O22-Cd2-O17 <sup>ii</sup>   | 86.68(16)  | O18-Cd2-O19                               | 52.75(14)  |
| O21-Cd2-O18                              | 133.33(16) | O21-Cd2-O17 <sup>ii</sup>   | 83.51(16)  | O16 <sup>ii</sup> -Cd2-O19                | 141.75(15) |
| O20-Cd2-O16 <sup>ii</sup>                | 91.64(17)  | O18-Cd2-O17 <sup>ii</sup>   | 143.12(15) | O17 <sup>ii</sup> -Cd2-O19                | 163.11(15) |
| O8 <sup>iii</sup> -Cd3-O12               | 89.54(17)  | O15-Cd3-O14                 | 55.57(16)  | O8 <sup>iii</sup> -Cd3-O27 <sup>iii</sup> | 73.63(15)  |
| O8 <sup>iii</sup> -Cd3-O15               | 105.65(19) | O19 <sup>iv</sup> -Cd3-O14  | 83.74(16)  | O12-Cd3-O27 <sup>iii</sup>                | 73.11(15)  |
| O8 <sup>iii</sup> -Cd3-O19 <sup>iv</sup> | 157.63(17) | O8 <sup>iii</sup> -Cd3-O13  | 83.73(16)  | O15-Cd3-O27 <sup>iii</sup>                | 78.06(16)  |
| O12-Cd3-O19 <sup>iv</sup>                | 89.61(16)  | O12-Cd3-O13                 | 54.76(15)  | O19 <sup>iv</sup> -Cd3-O27 <sup>iii</sup> | 127.20(15) |
| O15-Cd3-O19 <sup>iv</sup>                | 88.48(18)  | O15-Cd3-O13                 | 158.93(16) | O14-Cd3-O27 <sup>iii</sup>                | 124.55(15) |
| O8 <sup>iii</sup> -Cd3-O14               | 90.02(16)  | O19 <sup>iv</sup> -Cd3-O13  | 77.58(15)  | O13-Cd3-O27 <sup>iii</sup>                | 122.97(14) |
| O12-Cd3-O14                              | 161.26(15) | O14-Cd3-O13                 | 106.59(15) | O12-Cd3-O15                               | 141.99(17) |
| Cd1-O27-Cd3 <sup>iv</sup>                | 100.38(17) | Cd3 <sup>iii</sup> -O19-Cd2 | 129.71(19) | Cd3 <sup>iv</sup> -O8-Cd1                 | 106.71(17) |

**Symmetry Code :**

- (i) 2-x, 0.5+y, 1.5-z; (ii) -1-x, -0.5+y, 1.5-z; (iii) -1+x, y, z; (iv) 1+x, y, z;  
(v) 2-x, -0.5+y, 1.5-z; (vi) -1-x, 0.5+y, 1.5-z.

|                                                                                                                                                                 |          |        |          |                      |          |
|-----------------------------------------------------------------------------------------------------------------------------------------------------------------|----------|--------|----------|----------------------|----------|
| [[Cd <sub>3</sub> (L) <sub>2</sub> (4,4'-bpy) <sub>3</sub> (H <sub>2</sub> O) <sub>2</sub> ] <sub>2</sub> ·4(H <sub>2</sub> O)·(DEF)] <sub>n</sub> ( <b>2</b> ) |          |        |          |                      |          |
| <b>Bond Distances (Å)</b>                                                                                                                                       |          |        |          |                      |          |
| Cd1—N1 <sup>iii</sup>                                                                                                                                           | 2.363(6) | Cd1—N2 | 2.340(6) | Cd1—O1 <sup>ii</sup> | 2.427(5) |
| Cd1—O2 <sup>ii</sup>                                                                                                                                            | 2.310(4) | Cd1—O3 | 2.279(5) | Cd1—O4 <sup>i</sup>  | 2.270(5) |

|                                       |            |                                         |           |                                         |            |
|---------------------------------------|------------|-----------------------------------------|-----------|-----------------------------------------|------------|
| Cd2—N3                                | 2.318(7)   | N4—Cd2 <sup>iii</sup>                   | 2.385(8)  | Cd2—O1W                                 | 2.367(5)   |
| Cd2—O5 <sup>iv</sup>                  | 2.296(4)   |                                         |           |                                         |            |
| <b>Bond Angles (°)</b>                |            |                                         |           |                                         |            |
| O4 <sup>i</sup> -Cd1-O3               | 125.27(16) | O2 <sup>ii</sup> -Cd1-N2                | 91.18(17) | O4 <sup>i</sup> -Cd1-O1 <sup>ii</sup>   | 83.27(16)  |
| O4 <sup>i</sup> -Cd1-O2 <sup>ii</sup> | 134.44(17) | O4 <sup>i</sup> -Cd1-N1 <sup>iii</sup>  | 84.84(18) | O3-Cd1-O1 <sup>ii</sup>                 | 151.44(15) |
| O3-Cd1-O2 <sup>ii</sup>               | 97.64(17)  | O3-Cd1-N1 <sup>iii</sup>                | 82.00(18) | O2 <sup>ii</sup> -Cd1-O1 <sup>ii</sup>  | 55.62(15)  |
| O4 <sup>i</sup> -Cd1-N2               | 104.04(18) | O2 <sup>ii</sup> -Cd1-N1 <sup>iii</sup> | 87.04(17) | N2-Cd1-O1 <sup>ii</sup>                 | 83.71(18)  |
| O3-Cd1-N2                             | 87.43(19)  | N2-Cd1-N1 <sup>iii</sup>                | 168.9(2)  | N1 <sup>iii</sup> -Cd1-O1 <sup>ii</sup> | 104.13(17) |
| O5-Cd2-O5 <sup>iv</sup>               | 179.3(3)   | N3-Cd2-O1W                              | 93.11(12) | O5-Cd2-N4 <sup>v</sup>                  | 90.33(13)  |
| O5-Cd2-N3                             | 89.67(13)  | O5-Cd2-O1W <sup>iv</sup>                | 87.98(17) | O5 <sup>iv</sup> -Cd2-N4 <sup>v</sup>   | 90.33(13)  |
| O5 <sup>iv</sup> -Cd2-N3              | 89.67(13)  | O5 <sup>iv</sup> -Cd2-O1W <sup>iv</sup> | 92.06(17) | N3-Cd2-N4 <sup>v</sup>                  | 180.000(3) |
| O5-Cd2-O1W                            | 92.06(17)  | N3-Cd2-O1W <sup>iv</sup>                | 93.11(12) | O1W-Cd2-N4 <sup>v</sup>                 | 86.89(12)  |
| O5 <sup>iv</sup> -Cd2-O1W             | 87.98(17)  | O1W-Cd2-O1W <sup>iv</sup>               | 173.8(2)  | O1W <sup>iv</sup> -Cd2-N4 <sup>v</sup>  | 86.89(12)  |

**Symmetry Code :**

(i) -x, -y, 2-z; (ii) -x, y, 1.5-z; (iii) x, -1+y, z; (iv) 1-x, y, 1.5-z; (v) x, 1+y, z.

| $\{[\text{Cd}(\text{HL})(\text{dpe})_{0.5}(\text{H}_2\text{O})]_2 \cdot (\text{H}_2\text{O})\}_n$ ( <b>3</b> ) |            |                                       |           |                         |            |
|----------------------------------------------------------------------------------------------------------------|------------|---------------------------------------|-----------|-------------------------|------------|
| <b>Bond Distances (Å)</b>                                                                                      |            |                                       |           |                         |            |
| Cd1—N1                                                                                                         | 2.279(6)   | Cd1—O1 <sup>i</sup>                   | 2.358(5)  | Cd1—O2                  | 2.346(6)   |
| Cd1—O3 <sup>ii</sup>                                                                                           | 2.363(5)   | Cd1—O4 <sup>ii</sup>                  | 2.435(5)  | Cd1—O8                  | 2.404(5)   |
| <b>Bond Angles (°)</b>                                                                                         |            |                                       |           |                         |            |
| O2-Cd1-N1                                                                                                      | 128.38(19) | N1-Cd1-O1 <sup>i</sup>                | 90.24(18) | N1-Cd1-O3 <sup>ii</sup> | 90.90(17)  |
| N1-Cd1-O4 <sup>ii</sup>                                                                                        | 145.51(17) | N1-Cd1-O8                             | 85.00(19) | O2-Cd1-O1 <sup>i</sup>  | 100.39(17) |
| O1 <sup>i</sup> -Cd1-O3 <sup>ii</sup>                                                                          | 101.50(17) | O1 <sup>i</sup> -Cd1-O4 <sup>ii</sup> | 92.06(16) | O1 <sup>i</sup> -Cd1-O8 | 175.17(16) |
| O2-Cd1-O3 <sup>ii</sup>                                                                                        | 134.49(17) | O2-Cd1-O4 <sup>ii</sup>               | 84.94(18) | O2-Cd1-O8               | 83.25(18)  |

|                                        |           |                          |           |                         |           |
|----------------------------------------|-----------|--------------------------|-----------|-------------------------|-----------|
| O3 <sup>ii</sup> -Cd1-O4 <sup>ii</sup> | 54.95(16) | O3 <sup>ii</sup> -Cd1-O8 | 77.84(18) | O8-Cd1-O4 <sup>ii</sup> | 91.43(17) |
|----------------------------------------|-----------|--------------------------|-----------|-------------------------|-----------|

**Symmetry Code :**

(i) -x, -y, 1-z; (ii) x, -1+y, z; (iii) x, 1+y, z; (iv) -x, -y, 2-z.

| [[Cd(HL)(dpd) <sub>0.5</sub> (H <sub>2</sub> O)] <sub>n</sub> ( <b>4</b> ) |           |                                       |          |                         |            |
|----------------------------------------------------------------------------|-----------|---------------------------------------|----------|-------------------------|------------|
| <b>Bond Distances (Å)</b>                                                  |           |                                       |          |                         |            |
| Cd1—N1                                                                     | 2.279(6)  | Cd1—O1                                | 2.230(5) | Cd1—O2 <sup>i</sup>     | 2.346(6)   |
| Cd1—O3 <sup>ii</sup>                                                       | 2.348(6)  | Cd1—O4 <sup>ii</sup>                  | 2.417(6) | Cd1—O8                  | 2.403(6)   |
| N2—N2 <sup>iv</sup>                                                        | 1.167(17) |                                       |          |                         |            |
| <b>Bond Angles (°)</b>                                                     |           |                                       |          |                         |            |
| O1-Cd1-N1                                                                  | 128.8(2)  | N1-Cd1-O2 <sup>i</sup>                | 89.7(2)  | N1-Cd1-O3 <sup>ii</sup> | 89.8(2)    |
| N1-Cd1-O4 <sup>ii</sup>                                                    | 143.6(2)  | N1-Cd1-O8                             | 85.3(2)  | O1-Cd1-O2 <sup>i</sup>  | 100.3(2)   |
| O1-Cd1-O3 <sup>ii</sup>                                                    | 135.2(2)  | O1-Cd1-O4 <sup>ii</sup>               | 86.5(2)  | O1-Cd1-O8               | 82.6(2)    |
| O2 <sup>i</sup> -Cd1-O3 <sup>ii</sup>                                      | 101.8(2)  | O2 <sup>i</sup> -Cd1-O4 <sup>ii</sup> | 92.2(2)  | O2 <sup>i</sup> -Cd1-O8 | 174.91(19) |
| O3 <sup>ii</sup> -Cd1-O4 <sup>ii</sup>                                     | 54.3(2)   | O3 <sup>ii</sup> -Cd1-O8              | 78.7(2)  | O8-Cd1-O4 <sup>ii</sup> | 92.1(2)    |

**Symmetry Code :**

(i) 1-x, 2-y, 1-z; (ii) x, 1+y, z; (iii) x, -1+y, z; (iv) 2-x, 3-y, 2-z.

| [[Cd(HL)(1,2-dpe) <sub>0.5</sub> ]] <sub>n</sub> ( <b>5</b> ) |            |                          |            |                          |            |
|---------------------------------------------------------------|------------|--------------------------|------------|--------------------------|------------|
| <b>Bond Distances (Å)</b>                                     |            |                          |            |                          |            |
| Cd1—N1                                                        | 2.282(3)   | Cd1—O1                   | 2.283(3)   | Cd1—O2 <sup>i</sup>      | 2.258(3)   |
| Cd1—O3 <sup>ii</sup>                                          | 2.359(3)   | Cd1—O4 <sup>ii</sup>     | 2.308(3)   | Cd1—O6 <sup>iii</sup>    | 2.362(3)   |
| <b>Bond Angles (°)</b>                                        |            |                          |            |                          |            |
| O2 <sup>i</sup> -Cd1-N1                                       | 96.56(11)  | N1-Cd1-O1                | 108.96(11) | N1-Cd1-O3 <sup>ii</sup>  | 89.76(10)  |
| N1-Cd1-O4 <sup>ii</sup>                                       | 100.02(11) | N1-Cd1-O6 <sup>iii</sup> | 167.82(11) | O2 <sup>i</sup> -Cd1-O1  | 113.57(10) |
| O1-Cd1-O3 <sup>ii</sup>                                       | 145.83(10) | O1-Cd1-O4 <sup>ii</sup>  | 91.75(10)  | O1-Cd1-O6 <sup>iii</sup> | 82.95(11)  |



|                                        |           |                                         |            |                                         |           |
|----------------------------------------|-----------|-----------------------------------------|------------|-----------------------------------------|-----------|
| O2 <sup>i</sup> -Cd1-O3 <sup>ii</sup>  | 91.45(10) | O2 <sup>i</sup> -Cd1-O4 <sup>ii</sup>   | 143.12(10) | O2 <sup>i</sup> -Cd1-O6 <sup>iii</sup>  | 75.66(12) |
| O4 <sup>ii</sup> -Cd1-O3 <sup>ii</sup> | 56.14(9)  | O3 <sup>ii</sup> -Cd1-O6 <sup>iii</sup> | 81.19(10)  | O4 <sup>ii</sup> -Cd1-O6 <sup>iii</sup> | 81.75(11) |

**Symmetry Code :**

(i) 2-x, 1-y, 1-z; (ii) x, -1+y, z; (iii) 1+x, -1+y, z; (iv) x, 1+y, z; (v) -1+x, 1+y, z; (vi) 1-x, 1-y, -z.

| {[Cd <sub>3</sub> (L) <sub>2</sub> (1,3-dpp) <sub>2</sub> ]·3H <sub>2</sub> O} <sub>n</sub> ( <b>6</b> ) |            |                                         |            |                                         |            |
|----------------------------------------------------------------------------------------------------------|------------|-----------------------------------------|------------|-----------------------------------------|------------|
| <b>Bond Distances (Å)</b>                                                                                |            |                                         |            |                                         |            |
| N1—Cd1                                                                                                   | 2.261(5)   | Cd1—N2 <sup>v</sup>                     | 2.344(5)   | Cd1—O7 <sup>iv</sup>                    | 2.333(4)   |
| Cd1—O3 <sup>ii</sup>                                                                                     | 2.335(4)   | Cd1—O4 <sup>ii</sup>                    | 2.542(4)   | O1—Cd1                                  | 2.301(4)   |
| O2—Cd1                                                                                                   | 2.604(4)   | Cd2—O1 <sup>vi</sup>                    | 2.302(4)   | Cd2—O4 <sup>vii</sup>                   | 2.276(4)   |
| Cd2—O6 <sup>iii</sup>                                                                                    | 2.182(4)   | Cd1—Cd2 <sup>ii</sup>                   | 3.4543(13) |                                         |            |
| <b>Bond Angles (°)</b>                                                                                   |            |                                         |            |                                         |            |
| Cd1-O1-Cd2 <sup>ii</sup>                                                                                 | 97.26(14)  | Cd2-O4-Cd1 <sup>iii</sup>               | 91.43(13)  | N1-Cd1-O1                               | 141.83(15) |
| N1-Cd1-O7 <sup>iv</sup>                                                                                  | 90.10(16)  | O1-Cd1-O7 <sup>iv</sup>                 | 89.96(15)  | N1-Cd1-O3 <sup>ii</sup>                 | 90.35(16)  |
| O1-Cd1-O3 <sup>ii</sup>                                                                                  | 127.63(14) | O7 <sup>iv</sup> -Cd1-O3 <sup>ii</sup>  | 84.71(15)  | N1-Cd1-N2 <sup>v</sup>                  | 98.54(17)  |
| O1-Cd1-N2 <sup>v</sup>                                                                                   | 81.70(15)  | O7 <sup>iv</sup> -Cd1-N2 <sup>v</sup>   | 171.00(16) | O3 <sup>ii</sup> -Cd1-N2 <sup>v</sup>   | 97.68(15)  |
| N1-Cd1-O4 <sup>ii</sup>                                                                                  | 142.66(15) | O1-Cd1-O4 <sup>ii</sup>                 | 75.27(13)  | O7 <sup>iv</sup> -Cd1-O4 <sup>ii</sup>  | 95.02(14)  |
| O3 <sup>ii</sup> -Cd1-O4 <sup>ii</sup>                                                                   | 53.55(13)  | N2 <sup>v</sup> -Cd1-O4 <sup>ii</sup>   | 79.65(15)  | N1-Cd1-O2                               | 89.34(15)  |
| O1-Cd1-O2                                                                                                | 52.77(13)  | O7 <sup>iv</sup> -Cd1-O2                | 96.37(15)  | O3 <sup>ii</sup> -Cd1-O2                | 178.88(14) |
| N2 <sup>v</sup> -Cd1-O2                                                                                  | 81.30(15)  | O4 <sup>ii</sup> -Cd1-O2                | 126.56(13) | N1-Cd1-Cd2 <sup>ii</sup>                | 164.85(12) |
| O1-Cd1-Cd2 <sup>ii</sup>                                                                                 | 41.39(9)   | O7 <sup>iv</sup> -Cd1-Cd2 <sup>ii</sup> | 74.77(11)  | O3 <sup>ii</sup> -Cd1-Cd2 <sup>ii</sup> | 87.49(10)  |
| N2 <sup>v</sup> -Cd1-Cd2 <sup>ii</sup>                                                                   | 96.61(12)  | O4 <sup>ii</sup> -Cd1-Cd2 <sup>ii</sup> | 41.19(9)   | O2-Cd1-Cd2 <sup>ii</sup>                | 93.09(9)   |
| O6 <sup>vi</sup> -Cd2-O6 <sup>iii</sup>                                                                  | 180.000(2) | O6 <sup>vi</sup> -Cd2-O4                | 90.93(16)  | O6 <sup>iii</sup> -Cd2-O4               | 89.07(16)  |
| O4 <sup>vii</sup> -Cd2-O4                                                                                | 179.999(1) | O6 <sup>vi</sup> -Cd2-O1 <sup>vi</sup>  | 86.70(15)  | O6 <sup>iii</sup> -Cd2-O1 <sup>vi</sup> | 93.30(15)  |

|                                         |            |                                          |           |                                          |            |
|-----------------------------------------|------------|------------------------------------------|-----------|------------------------------------------|------------|
| O4 <sup>vii</sup> -Cd2-O1 <sup>vi</sup> | 80.67(14)  | O4-Cd2-O1 <sup>vi</sup>                  | 99.33(14) | O1 <sup>vi</sup> -Cd2-O1 <sup>iii</sup>  | 180.000(1) |
| O6 <sup>vi</sup> -Cd2-Cd1 <sup>vi</sup> | 107.33(12) | O6 <sup>iii</sup> -Cd2-Cd1 <sup>vi</sup> | 72.67(12) | O4 <sup>vii</sup> -Cd2-Cd1 <sup>vi</sup> | 47.37(10)  |
| O4-Cd2-Cd1 <sup>vi</sup>                | 132.63(10) | O1 <sup>vi</sup> -Cd2-Cd1 <sup>vi</sup>  | 41.35(10) | O1 <sup>iii</sup> -Cd2-Cd1 <sup>vi</sup> | 138.65(10) |

### Symmetry Code :

(i) x, y, -1+z; (ii) -1+x, y, z; (iii) 1+x, y, z; (iv) -x, 2-y, 2-z; (v) x, y, 1+z; (vi) 1-x, 2-y, 2-z;

(vii) 2-x, 2-y, 2-z.

### References

1 D. De, T. K. Pal, S. Neogi, S. Senthilkumar, D. Das, S. S. Gupta and P. K. Bharadwaj, *Chem. – Eur. J.*, 2016, **22**, 3387–3396.

2 Sheldrick, G. M. *SHELXS-2014, Program for the Crystal Structure Solution*, University of Gottingen, Gottingen, Germany, **2014**.

3 Sheldrick, G. M., *SHELXL-2014, Program for the Crystal Structure Solution*, University of Gottingen, Gottingen, Germany, **2014**.

4 A. L. Spek, *PLATON*; The University of Utrecht: Utrecht, The Netherlands, **1999**.

5 W.-Q. Kan, J.-F. Ma, Y.-Y. Liu and J. Yang, *CrystEngComm*, 2012, **14**, 2316–2326

6 O. Theilmann, W. Saak, D. Haase and R. Beckhaus, *Organometallics*, 2009, **28**, 2799–2807.

7 D. Dobrzynska, L. B. Jerzykiewicz, J. Jezierska and M. Duczmal, *Cryst. Growth Des.*, 2005, **5**, 1945–1951.

8 K. Nakamoto, *Infrared and raman spectra of inorganic and coordination compounds*, Wiley and sons, New York, 5th edn, **1997**.

9 M. Grzywa, C. Geßner, D. Denysenko, B. Bredenkötter, F. Gschwind, K. M. Fromm, W.

Nitek, E. Klemm and D. Volkmer, *Dalton Trans.*, 2013, **42**, 6909–6921.

- 10 (a) J.-C. Dai, X.-T. Wu, S.-M. Hu, Z.-Y. Fu, J.-J. Zhang, W.-X. Du, H.-H. Zhang and R.-Q. Sun, *Eur. J. Inorg. Chem.*, 2004, **10**, 2096–2106, (b) J. Tao, X. Yin, Z.-B. Wei, R.-B. Huang and L.-S. Zheng, *Eur. J. Inorg. Chem.*, 2004, **1**, 125–133.
- 11 B. Bhattacharya, D. Saha, D. K. Maity, R. Dey and D. Ghoshal, *CrystEngComm*, 2014, **16**, 4783–4795.
